# Supplementary material
Source: ML conference proceedings conference paper supplement (https://aclanthology.org/2024.trustnlp-1.1)

Average Word Length Distribution

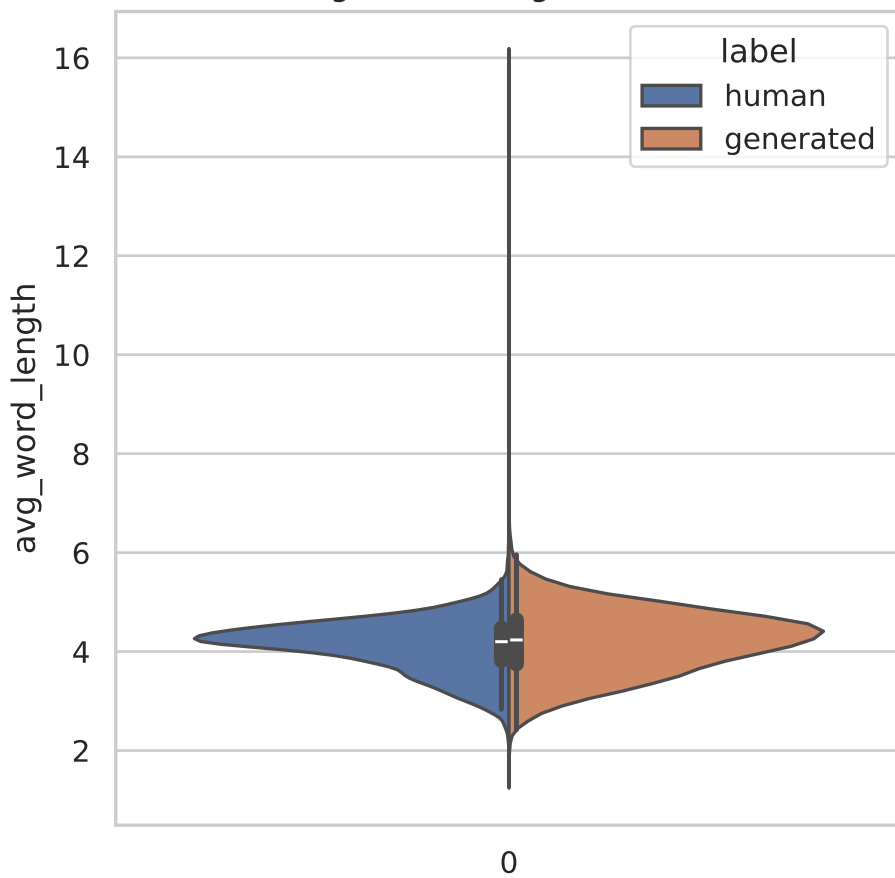

Average Sentence Length Distribution

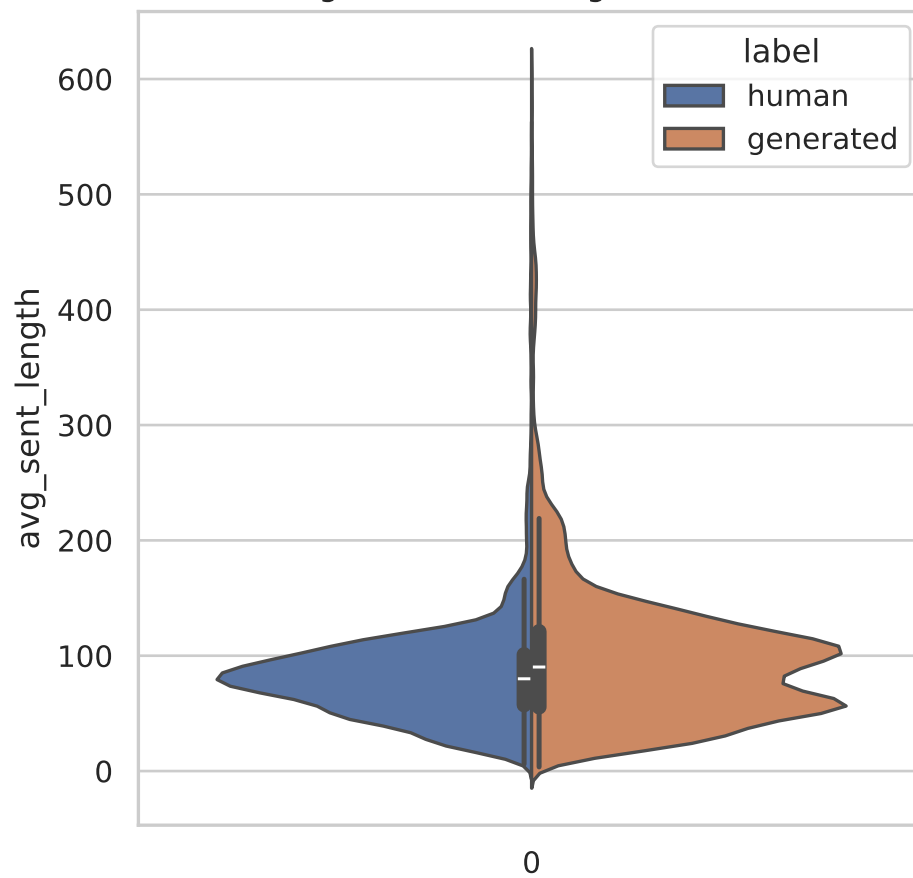

Vocabulary Richness Distribution

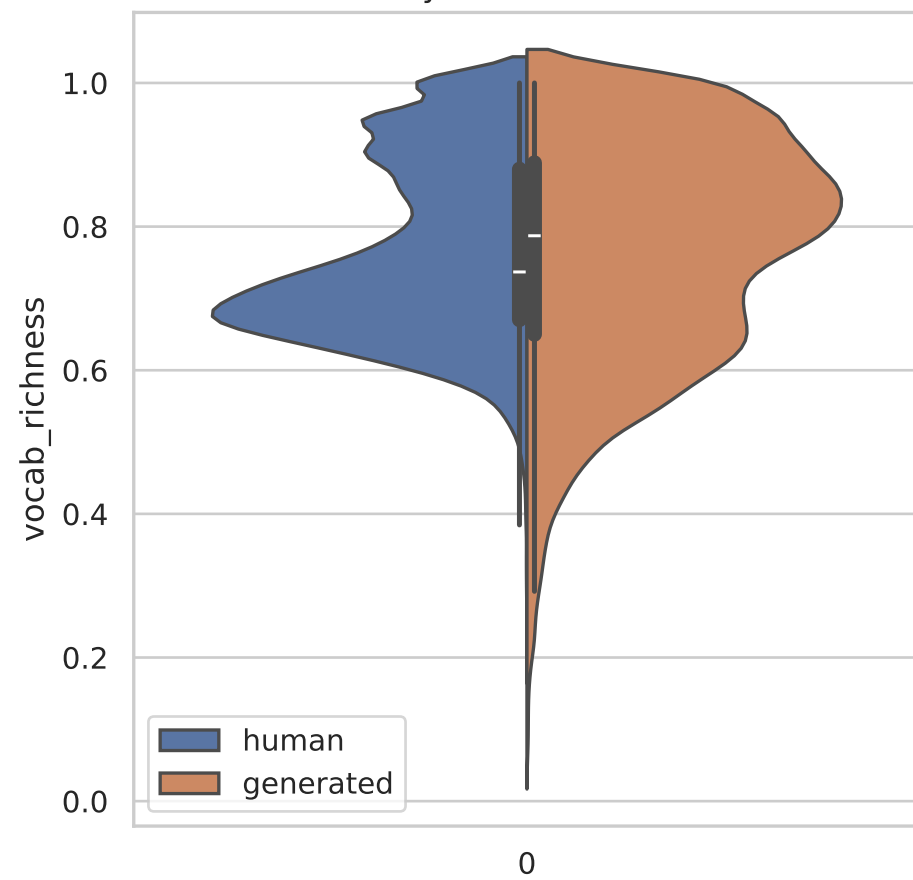

Repetition Rate Distribution

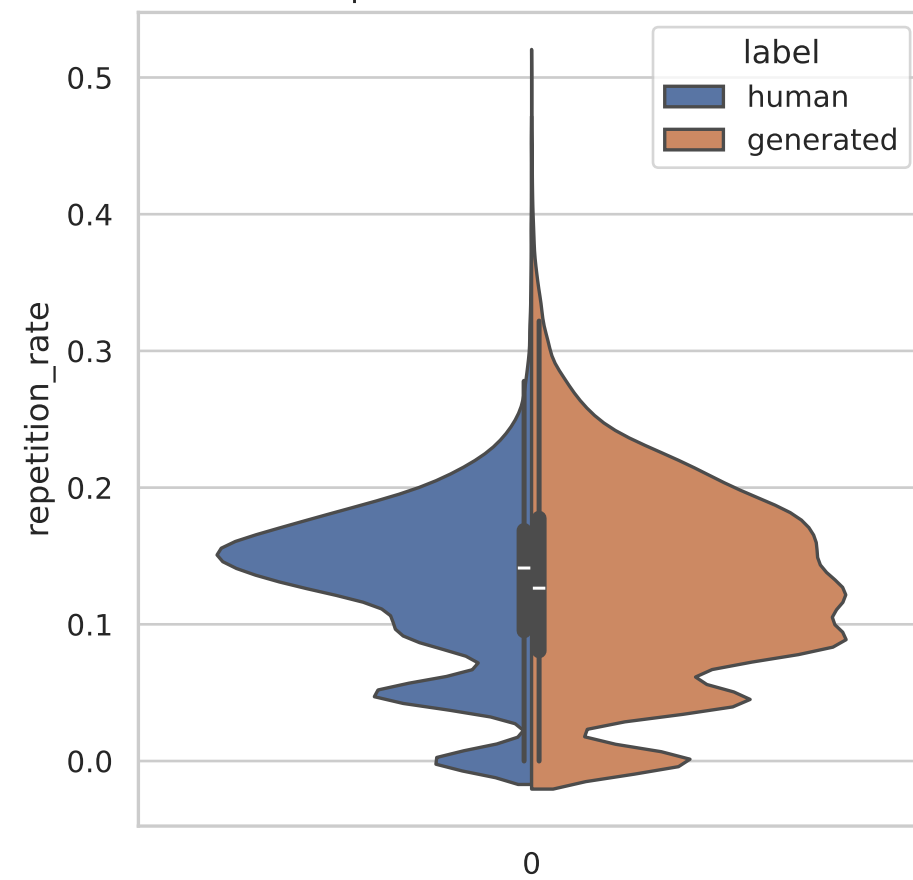

Supplement: SupplementaryMaterial [file 2024.trustnlp-1.1.SupplementaryMaterial.zip]
