# Supplementary material
Source: ML conference proceedings conference paper supplement (https://aclanthology.org/2024.trustnlp-1.1)

# Error Percentage by Models

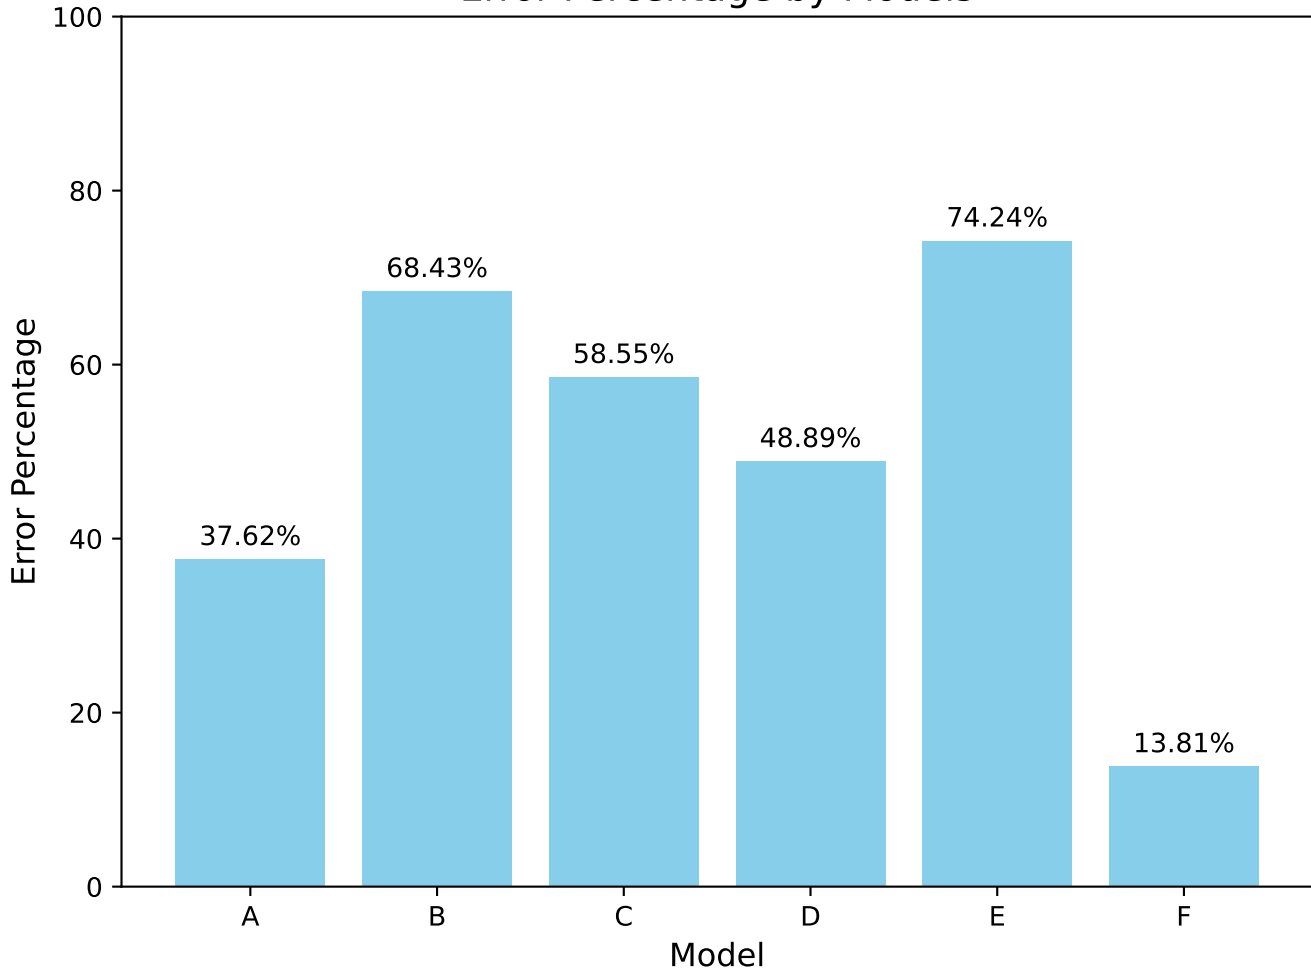

Supplement: SupplementaryMaterial [file 2024.trustnlp-1.1.SupplementaryMaterial.zip]
